# Supplementary material for: Improved oil recovery in nanopores: NanoIOR
Source: PubMed Central journal article supplement (PMC4913300; doi:10.1038/srep28128), 2016-06-20
Supplement: srep28128-s1.pdf [file srep28128-s1.pdf]

# Supplementary material:

## Improved oil recovery in nanopores: NanoIOR.

James Moraes de Almeida<sup>1</sup> and Caetano Rodrigues Miranda<sup>1,2</sup>

1: Centro de Ciências Naturais e Humanas, Universidade Federal do ABC, Santo André, SP, Brazil.

2: Instituto de Física, Universidade de São Paulo, São Paulo, SP, Brazil.

### 1. Structural data

Table S1: Number of atoms and system sizes for all the simulations.

| Structure                       | Number of atoms | X size | Y size | Z size | Water Thickness | Oil Thickness |
|---------------------------------|-----------------|--------|--------|--------|-----------------|---------------|
| Silica SiOH Rich                | 46794           | 96.81  | 96.81  | 94.76  | -               | -             |
| Silica SiOSi Rich               | 46320           | 96.81  | 96.81  | 94.37  | -               | -             |
| Silica SiOH Rich + Water        | 100794          | 99.07  | 99.07  | 128.27 | 33.51           | -             |
| Silica SiOSi Rich + Water       | 100320          | 99.57  | 99.57  | 127.99 | 33.62           | -             |
| Silica SiOH Rich + Oil          | 116562          | 98.62  | 98.62  | 145.18 | -               | 51.10         |
| Silica SiOSi Rich + Oil         | 116088          | 98.64  | 98.64  | 146.51 | -               | 52.78         |
| Silica SiOH Rich + Water + Oil  | 170562          | 99.60  | 99.60  | 191.02 | 32.72           | 64.47         |
| Silica SiOSi Rich + Water + Oil | 170088          | 98.74  | 98.74  | 193.12 | 33.58           | 65.84         |

### 2. Interatomic Potential description

#### 2.1 Silica:

The silica potential used was the Cruz-Chu, from reference: E. R. Cruz-Chu, *et al.* J. Phys. Chem. B, 110, 21497 (2006).

#### Naming:

We have adopted abbreviations for sake of simplicity, as follow in the next table.

Table S2: Abbreviations for the atomic names used.

| Element              | Name                         | Group Name        |
|----------------------|------------------------------|-------------------|
| H <sub>SiOH</sub>    | SiOH Hydrogen                | H <sub>Surf</sub> |
| H <sub>Si(OH)2</sub> | Si(OH) <sub>2</sub> Hydrogen |                   |
| O <sub>Bulk</sub>    | Bulk Oxygen                  | -                 |
| O <sub>SiOH</sub>    | SiOH Oxygen                  | O <sub>OH</sub>   |
| O <sub>Si(OH)2</sub> | Si(OH) <sub>2</sub> Oxygen   |                   |
| O <sub>SiOSi</sub>   | SiOSi Oxygen                 | -                 |
| Si <sub>Bulk</sub>   | Bulk Silicon                 | -                 |

|                      |                             |                    |
|----------------------|-----------------------------|--------------------|
| O <sub>SiOH</sub>    | SiOH Silicon                | Si <sub>Surf</sub> |
| O <sub>Si(OH)2</sub> | Si(OH) <sub>2</sub> Silicon |                    |

### Non-bonded interactions:

The potential we used have the following functional form for the non-bonded and electrostatic interactions:

$$E_{LJ} = 4\epsilon \left[ \left( \frac{\sigma}{r} \right)^{12} - \left( \frac{\sigma}{r} \right)^6 \right], \quad r < r_{cLJ}$$

Where,  $\epsilon$  and  $\sigma$  are the Lennard-Jones parameters, and  $r_{cLJ}$  is the cutoff for the explicit calculation of the interactions and  $r$  is the distance between the atoms. The used cutoff is 10 Å, with tail corrections.

$$E_{Coul} = \frac{Cq_iq_j}{r}, \quad r < r_{cCoul}$$

Where  $C$  is the Coulomb's constant,  $q_i$  and  $q_j$  are the charges of atoms  $i$  and  $j$ ,  $r$  is the distance between the atoms and  $r_{cCoul}$  is the cutoff to explicitly calculate the interactions. The used cutoff was of 10 Å, the longer distances interactions were calculated in the reciprocal space with the pppm method.

In the following table the non-bonded interaction for the silica are shown:

Table S3: Lennard-Jones parameters and charges for the different atoms defined in the potential.

| Element              | $\epsilon$ | $\sigma$ | Charge  |
|----------------------|------------|----------|---------|
| H <sub>SiOH</sub>    | 0.0460     | 0.400000 | 0.4320  |
| H <sub>Si(OH)2</sub> | 0.0460     | 0.400000 | 0.4320  |
| O <sub>Bulk</sub>    | 0.1500     | 3.118145 | -0.4500 |
| O <sub>SiOH</sub>    | 0.1521     | 3.153781 | -0.6579 |
| O <sub>Si(OH)2</sub> | 0.1521     | 3.153781 | -0.6580 |
| O <sub>SiOSi</sub>   | 0.1500     | 3.118145 | -0.4500 |
| Si <sub>Bulk</sub>   | 0.3000     | 3.826410 | 0.9000  |
| O <sub>SiOH</sub>    | 0.3000     | 3.826410 | 0.9010  |
| O <sub>Si(OH)2</sub> | 0.3000     | 3.826410 | 0.9020  |

### Bonded Interactions

#### Harmonic bonds:

The bonds were considered as harmonic interactions, with the following functional form:

$$E = K(r - r_0)^2$$

Where  $K$  is the spring constant and  $r_0$  the equilibrium position. The parameters are as follow in the next table:

Table S4: Bond parameters of the silica potential.

| Elements                             | K      | $r_0$ |
|--------------------------------------|--------|-------|
| O <sub>OH</sub> - H <sub>Surf</sub>  | 545.00 | 0.96  |
| O <sub>OH</sub> - Si <sub>Surf</sub> | 428.00 | 1.42  |

|                                         |        |      |
|-----------------------------------------|--------|------|
| O <sub>Bulk</sub> - Si <sub>Bulk</sub>  | 885.10 | 1.61 |
| O <sub>Bulk</sub> - Si <sub>Surf</sub>  | 885.10 | 1.61 |
| O <sub>SiOSi</sub> - Si <sub>Surf</sub> | 885.10 | 1.61 |
| O <sub>SiOSi</sub> - Si <sub>Bulk</sub> | 885.10 | 1.61 |
| O <sub>OH</sub> - O <sub>OH</sub>       | 5.00   | 3.50 |

#### Harmonic Angles:

The angles were also considered as harmonic, the functional form is:

$$E = K(\theta - \theta_0)^2$$

Where K is the spring constant and  $\theta_0$  the equilibrium angle. The used parameters are as follows:

Table S5: Angle parameters for the silica potential.

| Elements                                                     | K      | $\Theta_0$ |
|--------------------------------------------------------------|--------|------------|
| Si <sub>Surf</sub> - O <sub>OH</sub> - H <sub>Surf</sub>     | 57.50  | 106.00     |
| Si <sub>Bulk</sub> - O <sub>Bulk</sub> - Si <sub>Bulk</sub>  | 4.66   | 174.22     |
| Si <sub>Surf</sub> - O <sub>Bulk</sub> - Si <sub>Bulk</sub>  | 4.66   | 174.22     |
| Si <sub>Surf</sub> - O <sub>Bulk</sub> - Si <sub>Surf</sub>  | 4.66   | 174.22     |
| O <sub>SiOSi</sub> - Si <sub>Bulk</sub> - O <sub>Bulk</sub>  | 159.57 | 110.93     |
| O <sub>SiOSi</sub> - Si <sub>Bulk</sub> - O <sub>SiOSi</sub> | 159.57 | 110.93     |
| O <sub>SiOSi</sub> - Si <sub>Surf</sub> - O <sub>OH</sub>    | 153.26 | 111.09     |

#### 2.2. Water:

The used water potential was taken from Alejandro, J., *et al.* J. Chem. Phys. 130, 174505 (2009). All the parameters can be found in the reference.

#### 2.3. Oil:

For Oil, the chosen potential was CHARMM, the reference with all the potential parameters can be found at: Brooks, B. R. *et al.* J. Comp. Chem. 30, 1545 (2009).

### 3. Velocity profile equilibration:

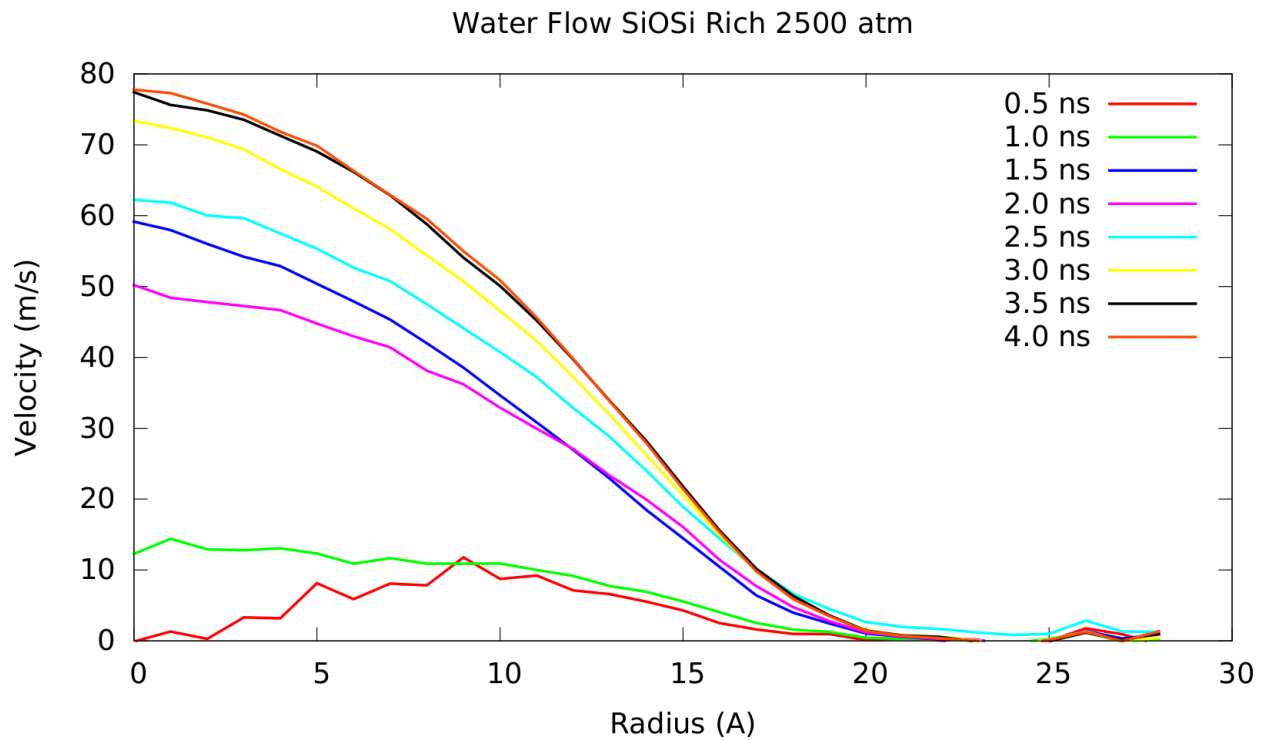

Figure S1: Radial velocity profile evolution along the equilibration of the flow.

#### 4. Radial stress profile:

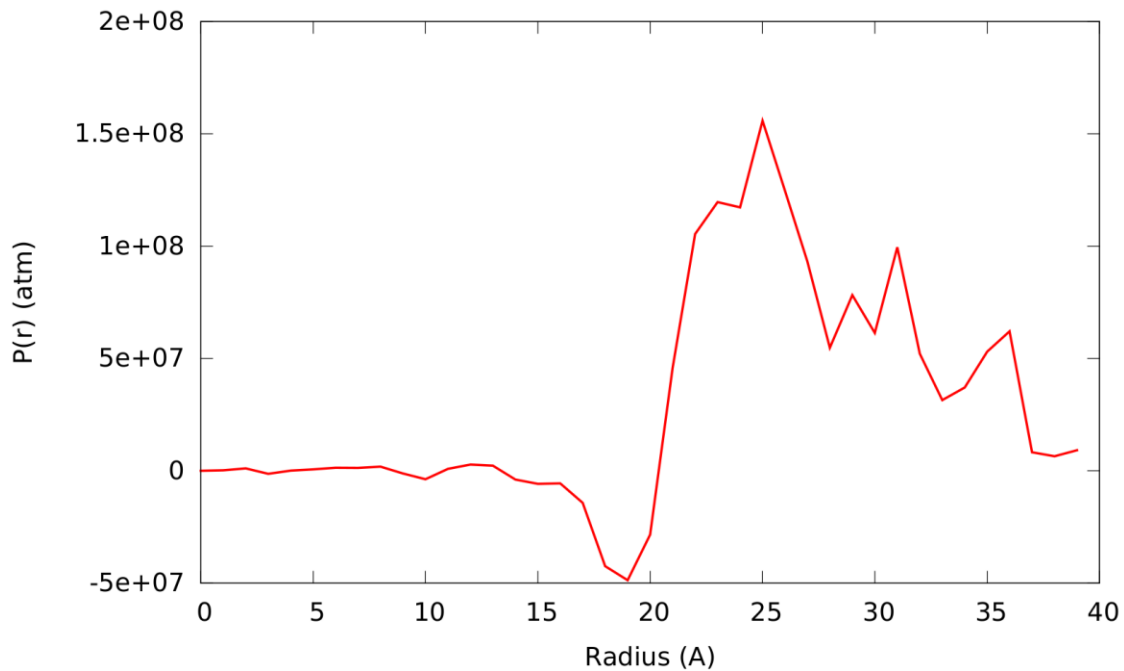

Figure S2: Radial stress profile from the center of the pore, crossing the interface and reaching the silica region.
